# Supplementary material for: Process of developing a cervical cancer education program for female university students in a health and physical education teacher training course: an action research
Source: Research Square preprint supplement (doi:10.21203/rs.3.rs-2032049/v1), 2022-09-21
Supplement: Supplementary file 1 [file 3eb16e5c5331dcc18cded7b1.xlsx]

## Sheet: table2
Table 2 Contents of the cervical cancer education materials for university students
Prototype version				Modified version
Major items	Moderate items	Small items		Major items	Moderate items	Small items
What kind of disease is cervical cancer?				What is cervical cancer?	Symptoms
	Causes of cervical cancer	Familiar viral HPV			Causes of cervical cancer	HPV
		Transmission route (sex)				Transmission route (sex)
	Other cancers associated with HPV infection	HPV-related cancers that develop when men are infected				HPV is transmitted to both men and women
	Current status of cervical cancer (death/morbidity statistics)				Japanese cancer (statistics of death and morbidity)
To prevent cervical cancer	About the HPV vaccine			Early detection of cancer	About HPV vaccine	Column: From university faculty
	Cervical cancer screening is available from the age of 20				Who and how often should I have a cervical cancer screening?	Every woman who is 20 years old or older. Every 2 years
	Other cancer screening: Cancer screening based on scientific evidence	Cancer screening is for 'healthy people'			Cancer screening to save many lives: Cancer screening based on scientific evidence	Cancer screening is for those who are healthy
	Where and what to do in cervical cancer screening				How is cervical cancer screening performed? (from a survivor)	Brush reference diagram
						When you go for a medical check-up, wear easy-to-wear clothes!
						Column: Student screening experience
						Column: Gynecologist
					Can most cancers be prevented	12 new ways to prevent cancer
					What is the prevention of 'cancer'?
If you are told you have cervical cancer	If it is pointed out that you are suspected of having cervical cancer	The symptoms and progression		What if abnormalities are found in the cervical cancer screening?	What if abnormalities are diagnosed as a result of the detailed inspection?	The symptoms and progression
		What kind of treatment will be given? (Such as conization)				What is conization?
		About life after that
Message from cervical cancer survivors	Survivor's words
