# Supplementary material for: Process of developing a cervical cancer education program for female university students in a health and physical education teacher training course: an action research
Source: Research Square preprint supplement (doi:10.21203/rs.3.rs-2032049/v1), 2022-09-21
Supplement: Supplementary file 2 [file 6f62017c6754ab6eba000e33.xlsx]

## Sheet: table3
Table 3 Results of content analysis of the student report
Category	Subcategory	Code
Awareness improvement (7)	Recognition of vaccine (4)	It would be OK if you hit the vaccine (2)
		Vaccines are scary (9)
		No resistance to vaccination (3)
		Vaccination is better (2)
	Recognition of the current state of cancer (5)	Afraid of getting cancer (3)
		Scary/Sad (5)
		There are cancer patients nearby (2)
		Should be interested in health care (6)
		Anxiety has been resolved (1)
	Recognition of cancer screening (4)	I'm afraid of undergoing a cancer screening (2)
		It is better to have cancer screening (7)
		It is difficult to get a cancer screening (5)
		The cancer screening rate is low (6)
	Sinse that cancer is close by (4)	Close to the cancer center (7)
		Ownership (1)
		Patients with cancer (1)
		Familiar diseases (1)
	Raising awareness of cancer information (2)	Need information about cancer screening (2)
		Need information about cancer (15)
	Improve learning motivation (3)	I want to know more about cancer (6)
		The right knowledge can be obtained (1)
		It was a fulfilling training (1)
	Gratitude (1)	Gratitude (9)
Improvement of knowledge level (3)	Improving cancer knowledge (6)	Cancer screening is effective (3)
		Effectiveness of vaccination (4)
		Actual status of cervical cancer (3)
		Cervical cancer and smoking (6)
		Mechanism of HPV infection (1)
		Cervical cancer (2)
	New learning (5)	I learned something (8)
		Learning itself is a valuable experience (3)
		My views changed (2)
		I pretended to know (1)
		I participated for the first time (1)
	The difficulty of the course content (1)	About my understanding (3)
Preparation for action (5)	I want to act for myself (1)	I want to go for cancer screening (6)
	I want to act for my family and friends (4)	Invite family and friends to go for cancer screening (5)
		I wanted to tell my family and friends, and I did (4)
		I want those in the same generation to know (3)
		Tell those close to you (7)
	I want to spread cancer knowledge (4)	I want to spread cancer knowledge (18)
		I want to use it for enlightenment activity (1)
		Local government's recommendation of the examination (1)
		I want to cooperate with smoking cessation (1)
	Important points to convey (3)	Reliable information (1)
		How to convey the information obtained (1)
		Delivering appropriate information to those who need it (1)
	Utilizing the information in the future (4)	I want to make use of in-seminar activities (3)
		I want to apply what I have learned in the future (1)
		I want to make use of my graduation research (1)
		I want to convey this knowledge as a teacher (1)
The number in () indicates the number of sub-items
