# Supplementary material for: Process of developing a cervical cancer education program for female university students in a health and physical education teacher training course: an action research
Source: Research Square preprint supplement (doi:10.21203/rs.3.rs-2032049/v1), 2022-09-21
Supplement: Supplementary file 3 [file eb182966a75bf3dc9b08ae3d.xlsx]

## Sheet: table1
Table1 Prototype version review results
Reviewer	Type	Evaluation results*			Propriety of publication	Comment
		Scientific rational	Ease of understanding	Propriety
A	Gynecologist (gynecologic oncology	〇	〇	〇	Yes	Check the color and size of the characters that must be emphasized.
B	Gynecologist (gynecologic oncology	△	△	△	－	Is there evidence that consuming vegetables and fruits reduces the risk of developing cancer? In recent years, it has become a problem for cancer patients to use extreme diets without evidence, and this statement is of concern. The same goes for the statement that a balanced diet can prevent many cancers. Is it necessary to explain not only the countermeasure type of screening but also the option…
C	University lecturer (public health)	○	○	○	Yes	I thought the content was appropriate. I think it can be evaluated highly as the examination is devised such that it can be imagined specifically. However, some places were difficult to read due to the breaks in the text and the centering. Currently, it is A4 size, but I think that B5 would be fine as it is easier to carry around.
D	University lecturer (Health communication)	〇	〇	〇	Yes	I thought it would be very useful as material from a woman’s perspective (we were curious about women's concerns, however, we could not ask them about this). Moreover, the sentences are easy to understand. In addition, the illustrations are also fashionable, and the format of the booklet is easy for young women to access. I thought that the recommended criteria for cancer screening could be updat…
E	Common adult women	－	〇	－	－	I could read many illustrations without difficulty. Though it is a page about cervical cancer, one gets the impression that consultation for cervical cancer starts suddenly. I felt that it would be better to change the page order. (Right) Is it easy to use as teaching material if page numbers are inserted throughout? (please ignore if it will be done in the future)
F	Common adult women	－	〇	－	－	My impression is that it was clear and easy to read. While the design is clear, spreads and sentences on the last page (what is cancer prevention?) were a bit hard to read because there were many line breaks in the middle of the words. The text itself was easy to understand, so if you change just the line feed, it will be smoother to read. The cover shows that it is for men and women. However, af…
G	Student	－	〇	－	Yes	I think the illustration is a very stylish design for our generation. I think the points and advice on clothes to wear when going for a medical examination would be very helpful. I think it is important to go out and wear the right clothes. By illustrating the kind of equipment that is used, I felt less anxious. I think it would be better to appeal from the point that having a health checkup whil…
H	Student	－	〇	－	Yes	The gender-specific illness rankings are displayed with illustrations, so that gender-specific cancers can be known, and looked out for. Because the tools and methods used in the examination are illustrated in detail, it is easier to imagine and so one can firmly prepare one's mind for it. On the other hand, one may feel more resistance due to the visual knowledge of the methods and tools used. F…
I	Cancer survivor	－	〇	〇	Yes	Thank you for the deadline. As you know, I am a complete amateur in the medical world, so please forgive my rude suggestions and just disregard them.
* 〇: Good △: Some improvement is required ×: Needs improvement -: impossible to Judge
